# Supplementary material for: Visualizing the human olfactory projection and ancillary structures in a 3D reconstruction
Source: PubMed Central journal article supplement (PMC11549439; doi:10.1038/s42003-024-07017-4), 2024-11-08
Supplement: 42003_2024_7017_MOESM4_ESM.pdf [file 42003_2024_7017_MOESM4_ESM.pdf]

## Reporting Summary

Nature Portfolio wishes to improve the reproducibility of the work that we publish. This form provides structure for consistency and transparency in reporting. For further information on Nature Portfolio policies, see our [Editorial Policies](#) and the [Editorial Policy Checklist](#).

### Statistics

For all statistical analyses, confirm that the following items are present in the figure legend, table legend, main text, or Methods section.

n/a Confirmed

- The exact sample size ( $n$ ) for each experimental group/condition, given as a discrete number and unit of measurement
- A statement on whether measurements were taken from distinct samples or whether the same sample was measured repeatedly
- The statistical test(s) used AND whether they are one- or two-sided  
*Only common tests should be described solely by name; describe more complex techniques in the Methods section.*
- A description of all covariates tested
- A description of any assumptions or corrections, such as tests of normality and adjustment for multiple comparisons
- A full description of the statistical parameters including central tendency (e.g. means) or other basic estimates (e.g. regression coefficient) AND variation (e.g. standard deviation) or associated estimates of uncertainty (e.g. confidence intervals)
- For null hypothesis testing, the test statistic (e.g.  $F$ ,  $t$ ,  $r$ ) with confidence intervals, effect sizes, degrees of freedom and  $P$  value noted  
*Give  $P$  values as exact values whenever suitable.*
- For Bayesian analysis, information on the choice of priors and Markov chain Monte Carlo settings
- For hierarchical and complex designs, identification of the appropriate level for tests and full reporting of outcomes
- Estimates of effect sizes (e.g. Cohen's  $d$ , Pearson's  $r$ ), indicating how they were calculated

*Our web collection on [statistics for biologists](#) contains articles on many of the points above.*

### Software and code

Policy information about [availability of computer code](#)

#### Data collection

Nikon Eclipse NiE microscope Nikon  
NIS elements AR Version 5.21.03 Nikon  
Pannoramic MIDI II fluorescence digital slide scanner 3DHISTECH <https://www.3dhitech.com>  
CaseViewer Version 2.4.0.119028 3DHISTECH <https://www.3dhitech.com/>

#### Data analysis

Adobe Suite: Acrobat Pro 2022, Photoshop 2022, Premiere Pro 2022 Adobe Adobe Creative Cloud  
Amira software Version 6.5.0 Thermo Fisher Scientific <https://www.thermofisher.com>  
Excel 2022 Microsoft Microsoft  
Fiji ImageJ2 version 2.3.0/1.53n Schindelin et al., 2012 <https://imagej.net/>  
Neuroglancer Maitin-Shepard et al., 2021 <https://github.com/google/neuroglancer>  
ParaView Version 5.10.1 Ahrens et al., 2005 Ayachit et al., 2015 <https://www.paraview.org>  
Python 3 Python Software Foundation <https://www.python.org/>  
SimpleElastix Marstal et al., 2016 <https://simpleelastix.github.io/>  
Tensorflow v2 Google <https://www.tensorflow.org/>  
U-Net architecture Ronneberger et al., 2015 <https://lmb.informatik.uni-freiburg.de>

Hardware/Infrastructure  
Auckland Bioengineering Institute High performance computing <https://www.auckland.ac.nz/en/abi.html>  
eResearch drive The University of Auckland <https://www.eresearch.auckland.ac.nz/>  
Globus University of Chicago <https://www.globus.org>

Nectar research cloud Australian Research Data Commons <https://ardc.edu.au/>  
 New Zealand eScience Infrastructure The University of Auckland <https://www.nesi.org.nz/>  
 Precision 7920 tower workstation (Intel Xeon Gold 5218 CPU (2.30GHz, 2295 Mhz, 16 core, 32 logical processors), NVIDIA Quadro P6000  
 24.0GB, and 128 GB RAM) DELL <https://www.dell.com>

Original code <https://doi.org/10.5281/zenodo.7865523>

For manuscripts utilizing custom algorithms or software that are central to the research but not yet described in published literature, software must be made available to editors and reviewers. We strongly encourage code deposition in a community repository (e.g. GitHub). See the Nature Portfolio [guidelines for submitting code & software](#) for further information.

## Data

Policy information about [availability of data](#)

All manuscripts must include a [data availability statement](#). This statement should provide the following information, where applicable:

- Accession codes, unique identifiers, or web links for publicly available datasets
- A description of any restrictions on data availability
- For clinical datasets or third party data, please ensure that the statement adheres to our [policy](#)

Original code: <https://doi.org/10.5281/zenodo.7865523>

## Research involving human participants, their data, or biological material

Policy information about studies with [human participants or human data](#). See also policy information about [sex, gender \(identity/presentation\), and sexual orientation](#) and [race, ethnicity and racism](#).

|                                                                    |                                                                                                                                                                                                                                                                             |
|--------------------------------------------------------------------|-----------------------------------------------------------------------------------------------------------------------------------------------------------------------------------------------------------------------------------------------------------------------------|
| Reporting on sex and gender                                        | <input type="text" value="yes"/>                                                                                                                                                                                                                                            |
| Reporting on race, ethnicity, or other socially relevant groupings | <input type="text" value="n/a"/>                                                                                                                                                                                                                                            |
| Population characteristics                                         | <input type="text" value="n/a"/>                                                                                                                                                                                                                                            |
| Recruitment                                                        | <input type="text" value="n/a"/>                                                                                                                                                                                                                                            |
| Ethics oversight                                                   | Postmortem en-bloc specimens were collected at the Human Anatomy Lab of The University of Auckland through the Human Body Bequest Programme, which is governed by the New Zealand Police, and in compliance with the Human Tissue Act 2008 from the New Zealand Parliament. |

Note that full information on the approval of the study protocol must also be provided in the manuscript.

## Field-specific reporting

Please select the one below that is the best fit for your research. If you are not sure, read the appropriate sections before making your selection.

Life sciences       Behavioural & social sciences       Ecological, evolutionary & environmental sciences

For a reference copy of the document with all sections, see [nature.com/documents/nr-reporting-summary-flat.pdf](https://nature.com/documents/nr-reporting-summary-flat.pdf)

## Life sciences study design

All studies must disclose on these points even when the disclosure is negative.

|                 |                                                                                                                                                                                                              |
|-----------------|--------------------------------------------------------------------------------------------------------------------------------------------------------------------------------------------------------------|
| Sample size     | n=6 Primary olfactory pathway en-bloc specimens extracted from embalmed human cadavers. A1130, A1144, A1147, A1161, A1164, A1177. Human Body Bequest Programme Human Anatomy Lab, The University of Auckland |
| Data exclusions | n=5 excluded for quality reasons described in the ms                                                                                                                                                         |
| Replication     | n=1                                                                                                                                                                                                          |
| Randomization   | n/a                                                                                                                                                                                                          |
| Blinding        | n/a                                                                                                                                                                                                          |

## Reporting for specific materials, systems and methods

We require information from authors about some types of materials, experimental systems and methods used in many studies. Here, indicate whether each material, system or method listed is relevant to your study. If you are not sure if a list item applies to your research, read the appropriate section before selecting a response.

## Materials & experimental systems

## Methods

- n/a  Involved in the study
- Antibodies
- Eukaryotic cell lines
- Palaeontology and archaeology
- Animals and other organisms
- Clinical data
- Dual use research of concern
- Plants

- n/a  Involved in the study
- ChIP-seq
- Flow cytometry
- MRI-based neuroimaging

## Antibodies

Antibodies used

Anti-Olfactory Marker Protein antibody, unconjugated, goat FUJIFILM Wako Shibayagi Cat#019-22291-WAKO; RRID: AB\_664696  
Anti-Vesicular Glutamate Transporter 2 antibody, unconjugated, guinea pig Frontier Science Cat#VGLuT2-GP-Af670-1

Alexa Fluor 647-AffiniPure donkey anti-Guinea pig IgG (H+L) (min X Bov,Ck,Gt,Sy Hms,Hrs,Hu,Ms,Rb,Rat,Shp Sr Prot) antibody Jackson ImmunoResearch Laboratories Cat#706-605-148; RRID: AB\_2340476  
Alexa Fluor Plus 594 donkey anti-goat IgG (H+L) highly cross-adsorbed secondary antibody Thermo Fisher Scientific Cat#A32758; RRID: AB\_2762828  
Biotin-SP-AffiniPure donkey anti-Goat IgG (H+L) antibody Jackson ImmunoResearch Laboratories Cat#705-065-003; RRID: AB\_2340396

Validation

Anti-Olfactory Marker Protein antibody: Peer-reviewed publications listed on manufacturer website  
Anti-Vesicular Glutamate Transporter 2 antibody: Manufacturer website "Validated for use in Western Blotting, Immunohistochemistry for the detection of VGLUT2 and Peer-reviewed publications listed on manufacturer website  
Ulex Europaeus Agglutinin-1 (UEA1) antibody: Peer-reviewed publications listed on manufacturer website

## Plants

Seed stocks

n/a

Novel plant genotypes

n/a

Authentication

n/a
